# Supplementary material for: Interplay of temperature, productivity, and community assemblage on hydrogen isotope signatures of algal lipid biomarkers
Source: Copernicus journal article supplement (doi:10.5194/bg-2017-60), 2017-02-27
Supplement: Supplementary file 1 [file Supplemental_file_1.docx]

**Lake Greifen:** Gamma decay measurements (error = 2σ); *1986 Chernobyl peak, **1963 Bomb testing peak

| Depth (cm) | Cs137 (Bq/kg) | Pb210 (Bq/kg) |
| --- | --- | --- |
| 0-1 | 9 ± 1 | 193 ± 13 |
| 4-5 | 27 ± 2* | 188 ± 15 |
| 8-9 | 26 ± 2 | 93 ± 12 |
| 11-12 | 29 ± 2 | 80 ± 13 |
| 14-15 | 36 ± 2** | 47 ± 9 |
| 16-17 | 11 ± 1 | 61 ± 12 |
| 18-19 | 3 ± 3 | 52 ± 14 |
| 20-21 | 3 ± 3 | 37 ± 10 |
| 24-25 | 3 ± 1 | 34 ± 3 |
| 29-30 | 2 ± 3 | 26 ± 5 |
| Inferred sediment accumulation rate | 0.3 cm yr-1 | 0.3 cm yr-1 |

**Lake Lucerne:** Gamma decay measurements (error = 2σ); *1986 Chernobyl peak, **1963 Bomb testing peak

| Depth (cm) | Cs137 (Bq/kg) | Pb210 (Bq/kg) |
| --- | --- | --- |
| 0-1 | 13 ± 2 | 193 ± 13 |
| 3-4 | 113 ± 5* | 188 ± 15 |
| 6-7 | 21 ± 2 | 93 ± 12 |
| 8-9 | 32 ± 2 | 80 ± 13 |
| 10-11 | 159 ± 5 | 47 ± 9 |
| 12-13 | 175 ± 6** | 61 ± 12 |
| 14-15 | 9 ± 2 | 52 ± 14 |
| 16-17 | 6 ± 9 | 37 ± 10 |
| 20-21 | 0 ± 2 | 34 ± 3 |
| 24-25 | 2 ± 2 | 26 ± 5 |
| Inferred sediment accumulation rate | 0.3 cm yr-1 | 0.3 cm yr-1 |
