# Supplementary material for: Interplay of temperature, productivity, and community assemblage on hydrogen isotope signatures of algal lipid biomarkers
Source: Copernicus journal article supplement (doi:10.5194/bg-2017-60), 2017-02-27
Supplement: Supplementary file 2 [file Supplemental_file_2.xlsx]

## Sheet: Lipid data
Lake Greifen
Date (YYMMDD)	Water d2H	Surface water temp (d C)	Conc nC14:0 (ug/L)	1 st dev	Conc nC16:0 (ug/L)	1 st dev	Conc nC16:1 (ug/L)	1 st dev	Conc nC18:x (ug/L)	1 st dev	Conc brass (ug/L)	1 st dev	Prod rate nC14:0 (ug L^-1 hr^-1)	1 st dev	Prod rate nC16:0 (ug L^-1 hr^-1)	1 st dev	Prod rate nC16:1 (ug L^-1 hr^-1)	1 st dev	Prod rate nC18:0 (ug L^-1 hr^-1)	1 st dev	Prod rate Brass (ug L^-1 hr^-1)	1 st dev	d2H nC14:0	1 st dev	d2H nC16:0	1 st dev	d2H nC16:1	1 st dev	d2H nC18:x	1 st dev	d2H Brass	1 st dev	alpha nC14:0	1 st dev	alpha nC16:0	1 st dev	alpha nC16:1	1 st dev	alpha nC18:x	1 st dev	alpha Brass	1 st dev
150414	-71	11.2	0.2	0.1	1	0.2	1.1	0.3	1	0.2	0.18	0.06											-247.037	3.67939	-108	5.4	-172.3	0.9	-158.6	11.6	-319.258	1.30239	0.8105	0.00396443	0.891	0.000969046	0.9601	0.0058276	0.9057	0.0125372	0.734331	0.00141378
150511	-73	18.5	2.87663	0.784219	17.5049	2.43015	8.966	4.31745	17.9711	2.54538	0.21854	0.0727242	0.0971127	0.013815	0.927072	0.12954	0.0396038	0.00519617	0.927618	0.0848598	0.00279285	0.000224724	-274.538	2.1	-190.3	2	-249.8	1.1	-209.9	0.9	-345.649	3.13886	0.7826	0.00223214	0.8092	0.00118286	0.8735	0.00213197	0.8523	0.000943317	0.703452	0.0033778
150605	-70	23.8	4.59003	1.16871	20.7018	2.06166	2.37613	0.418121	16.3407	0.987712	0.291323	0.167196	0.523848	0.0397686	2.31272	0.227507	0.118426	0.00781752	1.75917	0.118981	0.00498004	0.000590333	-289.6	3.5	-189.3	3.8	-256.5	8.2	-235.6	2.9	-336.894	0.627532	0.7639	0.00371718	0.7995	0.00878329	0.8717	0.00408391	0.822	0.00316913	0.712294	0.000691266
150702	-68	26.8	36.1127	1.99878	55.1353	4.02653	2.45565	0.241777	43.2788	5.91017	0.940315	0.192502	1.89481	0.0245191	2.73726	0.100924	0.142681	0.00303857	2.15605	0.0600524	0.00568351	0.00130347	-291.5	2.7	-176.7	1.7	-271.1	0.7	-247.7	2.9	-339.747	1.54165	0.7602	0.00286852	0.7788	0.000726863	0.8834	0.0018777	0.8072	0.00308672	0.708001	0.00166011
150811	-65	26	12.8803	2.40706	31.688	3.13471	6.94464	0.708149	25.9423	2.47445	0.358263	0.140432	0.849254	0.0772678	1.83441	0.0115733	0.262795	0.0242508	1.631	0.050074	0.00443935	0.000633479	-327.8	1	-216.214	3	-305	1	-236.8	1.9	-345.344	2.4841	0.7189	0.00105761	0.7433	0.00113044	0.8532	0.00577828	0.8162	0.00208559	0.701967	0.00266785
150831	-64	20.3	20.6202	5.13876	34.4873	5.07932	12.9973	2.37912	20.6202	5.13876	0.291257	0.105219	2.13971	0.467453	2.85624	0.247158	0.415306	0.0658827	2.46434	0.541086	0.00384194	0.00126966	-291.448	1.8644	-237.061	3.96683	-223.541	2.89552	-205.823	1.23503			0.7726	0.00179836	0.8287	0.00309526	0.8142	0.00423711	0.8476	0.00133043
Lake Lucerne
Date (YYMMDD)	Water d2H	Surface water temp (d C)	Conc nC14:0 (ug/L)	1 st dev	Conc nC16:0 (ug/L)	1 st dev	Conc nC16:1 (ug/L)	1 st dev	Conc nC18:x (ug/L)	1 st dev	Conc brass (ug/L)	1 st dev	Prod rate nC14:0 (ug L^-1 hr^-1)	1 st dev	Prod rate nC16:0 (ug L^-1 hr^-1)	1 st dev	Prod rate nC16:1 (ug L^-1 hr^-1)	1 st dev	Prod rate nC18:0 (ug L^-1 hr^-1)	1 st dev	Prod rate Brass (ug L^-1 hr^-1)	1 st dev	d2H nC14:0	1 st dev	d2H nC16:0	1 st dev	d2H nC16:1	1 st dev	d2H nC18:x	1 st dev	d2H Brass	1 st dev	alpha nC14:0	1 st dev	alpha nC16:0	1 st dev	alpha nC16:1	1 st dev	alpha nC18:x	1 st dev	alpha Brass	1 st dev
150415	-85	10.7	0.4	0.05	0.8	0.03	0.8	0.02	0.5	0.1	0.05	0.005											-297	2.3	-229.6	3.8	-248.6	3	-203.9	2.2	-300.064	1.64813	0.7683	0.0024797	0.8211	0.00330269	0.842	0.00419981	0.8701	0.00245037	0.766231	0.00181199
150513	-82	12.1	3.3129	1.15944	9.50661	2.15623	3.60633	0.744514	5.95812	0.702591	0.0859346	0.00520248	0.211313	0.0337388	0.597273	0.115509	0.12124	0.0262202	0.34059	0.0205271	0.000690379	0.000113514	-285.2	2.4	-233.4	6.1	-271.4	3.9	-233.9	1.2	-319.027	4.21697	0.7787	0.00266317	0.7937	0.00420998	0.8351	0.00665628	0.8345	0.00126756	0.736528	0.00456381
150603	-83	17.8	5.99069	2.7616	10.8417	2.91858	4.78744	3.52034	5.97326	1.16671	0.15063	0.0394675	0.293955	0.097463	0.611363	0.120422	0.0843758	0.0219047	0.378262	0.0517712	0.000722399	4.41575e-05	-286.8	4.5	-228.5	9	-272	4.3	-240.7	1.4	-287.233	5.7363	0.7778	0.00491351	0.7939	0.0046906	0.8413	0.00986855	0.8281	0.00153567	0.775652	0.00624469
150707	-84	24.5	5.37609	1.97759	12.3911	2.88972	3.26922	0.61929	6.97771	1.57402	0.0987566	0.0267139	0.288666	0.0491916	0.662995	0.0743417	0.0799075	0.0177598	0.4006	0.0592579	0.000864049	0.000174131	-315.9	4.5	-279.2	0.6	-295.2	1	-254.8	2.5	-311.968	2.76023	0.7469	0.00491537	0.7694	0.00111841	0.7869	0.000641065	0.8136	0.00269286	0.752814	0.00302459
150731	-86	20.1	6.11376	2.11206	15.1985	3.13089	5.2174	1.88382	10.8816	2.13657	0.101893	0.0233314	0.274216	0.055954	0.806193	0.0140136	0.094835	0.00755911	0.604542	0.0385626	0.000621526	0.000172504	-302.9	5.1	-271	1.5	-301.6	1.6	-267.7	1.3	-309.762	1.26646	0.7627	0.00561424	0.7642	0.00175702	0.7976	0.0016439	0.8012	0.00142188	0.754341	0.00139389
150831	-86	22.6	5.2386	0.946963	10.3355	1.26547	2.69263	1.3385	7.66389	0.695984	0.0917763	0.0168859	0.256349	0.0019305	0.470646	0.00123616	0.070161	0.00351459	0.362529	0.00706624	0.00035555	5.35787e-05	-291.1	3	-264.2	2.8	-283.3	5.2	-258.9	2	-309.615	1.8226	0.7756	0.00327845	0.7842	0.00573562	0.8051	0.00302689	0.8108	0.00224842	0.753791	0.00199681

## Sheet: Algal counts
Greifen
	Day of year	Cyanobacteria	Ciliates	Cryptophytes	Dinoflagellates	Euglenids	Golden Algae	Green Algae	Zygnemataceae	Diatoms	Total
12-Jan-2015	12	863112	1900	100956	3512	0	28365	59415	8550	21918	1087768
11-Feb-2015	42	227079	880	326565	1243	0	47379	11958	5158	61617	681919
12-Mar-2015	71	102846	12636	267978	28782	0	160230	91870	5298	1044132	1714012
13-Apr-2015	103	961020	23340	434172	57524	0	208686	98286	680	469140	2253008
6-May-2015	126	3156504	14040	166194	3492	0	3692	138252	80	53046	3535420
10-Jun-2015	161	324366	1040	242406	6904	0	1264374	1091622	10116	156984	3097972
7-Jul-2015	188	2007390	240	256332	60090	0	212808	660626	3326	1553382	4755594
5-Aug-2015	217	2262792	10020	1033224	13190	0	680760	2346910	12790	426240	6786646
2-Sep-2015	245	1243914	11780	339882	15174	0	1469154	3493694	4012	643920	7222050
6-Oct-2015	279	3708186	45204	822288	8510	40	1441992	2603692	15494	151770	8798336
11-Nov-2015	315	2441418	17260	561618	2286	120	253302	1531582	1240	1454456	6263602
14-Dec-2015	348	229356	1480	322272	840	0	58572	1035250	3772	66378	1718080
Lucerne
	Day of year	Cyanobacteria	Ciliates	Cryptophytes	Dinoflagellates	Golden Algae	Green Algae	Diatoms	Total
7-Jan-2014	7	118300	1510	277100	4610	88760	1270	121690	613680
6-Mar-2014	65	203240	2090	212800	5220	207920	57940	145450	834890
23-Apr-2014	113	15400	2447	151200	4780	259400	11740	213250	658877
11-Jun-2014	162	91000	3610	191700	32060	1171200	2810	151670	1645110
8-Aug-2014	220	662800	2330	32000	5450	413800	180	382200	1499520
11-Sep-2014	254	91600	5080	227600	13450	740400	8670	350140	1437480
11-Nov-2014	315	418500	3570	364800	7600	172180	6060	76760	1049750
